# Supplementary material for: Development of VUMAT and VUHARD Subroutines for Simulating the Dynamic Mechanical Properties of Additively Manufactured Parts
Source: MDPI journal article supplement (doi:10.3390/ma15010372), 2022-01-05
Supplement: s1 [file s1]

## S1. The developed code for VUHARD subroutine

```
C *****
      subroutine vuhard (
C Read only -
      *      nblock,
      *      jElem, kIntPt, kLayer, kSecPt,
      *      lAnneal, stepTime, totalTime, dt, cmname,
      *      nstatev, nfieldv, nprops,
      *      props, tempOld, tempNew, fieldOld, fieldNew,
      *      stateOld,
      *      eqps, eqpsRate,
C Write only -
      *      yield, dyieldDtemp, dyieldDeqps,
      *      stateNew)
C
      include 'vaba_param.inc'
C
      dimension props(nprops), tempOld(nblock), tempNew(nblock),
1      fieldOld(nblock,nfieldv), fieldNew(nblock,nfieldv),
2      stateOld(nblock,nstatev), eqps(nblock), eqpsRate(nblock),
3      yield(nblock), dyieldDtemp(nblock), dyieldDeqps(nblock,2),
4      stateNew(nblock,nstatev), jElem(nblock)
C
      character*80 cmname
C *****
C Print the constitutive model parameters
      kb3      = props(1)
      goi       = props(2)
      ddeqps0   = props(3)
      theta     = props(4)
      p         = props(5)
      q         = props(6)
      e0        = props(7)
      h         = props(8)
      k2        = props(9)
      abm       = props(10)
      Khp       = props(11)
      alpha     = props(12)
      ala       = props(13)
      t         = props(14)
      U0        = props(15)
      D         = props(16)
      T0        = props(17)
C*****
C      Print out material properties.
C*****
      write (*,*) 'The model constant parameters'
      write (*,*) 'kb3=', kb3
      write (*,*) 'goi=', goi
      write (*,*) 'ddeqps0=', ddeqps0
      write (*,*) 'theta=', theta
      write (*,*) 'p=', p
      write (*,*) 'q=', q
      write (*,*) 'e0=', e0
```

```

        write (*,*) 'h=',h
        write (*,*) 'k2=',k2
        write (*,*) 'abm=',abm
        write (*,*) 'Khp=',Khp
        write (*,*) 'alpha=',alpha
        write (*,*) 'ala=',ala
        write (*,*) 'laths thickness=',t
        write (*,*) 'U0=',U0
        write (*,*) 'D=',D
        write (*,*) 'T0=',T0
C
C The Hall-Petch relationship from the alpha length thickness (t)
C
        Khp_D=Khp/sqrt(t)
        write (*,*) 'Khp_D=',Khp_D

        do k = 1, nblock
            epps = eqps(k)
            temp = tempOld(k)
            write(*,*) 'temp=',temp
C Compute for Temperature dependent shear modulus
            if (temp.eq.0.D0) then
                U=U0
            else
                U=U0-((D/(exp(T0/temp)-1.0))) *10**3
            end if
            write (*,*) , 'U=',U
C
C Compute for the thermal part of flow stress
C
            thermal1=1-((kb3*temp)/(goi*U)*log(ddeqps0/ddeqps))**(1.0/q)
            thermal2=theta*thermal1**(1.0/p) *U/U0
            write (*,*) 'thermal1=',thermal1
            write (*,*) 'thermal2=',thermal2
C
C Compute for athermal part of flow stress
C
            athermal1=(1-exp(-k2*epps))*h/k2
            athermal2=e0*exp(-k2*epps)
            athermal3=ala*(1-exp(-alpha*ddeqps))
            athermal4=sqrt(athermal1+athermal2) *abm*U +athermal3 + Khp_D
            write (*,*) 'athermal1=',athermal1
            write (*,*) 'athermal2=',athermal2
            write (*,*) 'athermal3=',athermal3
            write (*,*) 'athermal4=',athermal4
C
C Compute for Total flow stress at different level of epps
C
            flowstress=thermal2+athermal4
            write (*,*) 'flowstress=',flowstress
C
C Compute for Partial derivative of Total flowstress w.r.t epps
C
            dathermal1=abm*U/2*(athermal1+athermal2)**(-1.0/2)
            dathermal2=h*exp(-k2*epps)-(e0*k2*exp(-k2*epps))
            dathermal3=dathermal1*dathermal2

```

```

        write (*,*) 'dathermal1=', dathermal1
        write (*,*) 'dathermal2=', dathermal2
        write (*,*) 'dathermal3=', dathermal3
C
C Assign an array of Partial derivative of Total flowstress w.r.t epps.
C
        dyieldDeqps(k,1) = dathermal3
        write (*,*) 'dyieldDeqps(k,1)=', dyieldDeqps(k,1)
C
C Compute the Partial derivatives of Total flowstress w.r.t ddeqps.
C
        eqpsRate(k)= ddeqps
        p2=(1.0-p)/p
        q2=(1.0-q)/q
        ddthermal1=(theta*temp*kb3)/(p*q*U*ddeqps)
        ddthermal2=(1-(log(ddeqps0/ddeqps) *kb3*temp/goi/U)**(1.0/q)) **p2
        ddthermal3=(log(ddeqps0/ddeqps) *kb3*temp/goi/U) **q2
        ddthermal4= alpha*exp(-alpha*ddeqps)
        ddthermal5=ddthermal1*ddthermal2*ddthermal3+ddthermal4
        write (*,*) 'ddthermal1=', ddthermal1
        write (*,*) 'ddthermal2=', ddthermal2
        write (*,*) 'ddthermal3=', ddthermal3
        write (*,*) 'ddthermal4=', ddthermal4
C
C Assign an array for partial derivatives of Total flowstress w.r.t ddeqps.
C
        dyieldDeqps(k,2) = ddthermal5
        write (*,*) ' dyieldDeqps(k,2)=', dyieldDeqps(k,2)
C
C Compute and return the yield stress.
C
        yield(k) = flowstress

        write (*,*) ' yield(k)=', yield(k)
        write (*,*) 'eqps=', eqps(k)
        write (*,*) 'eqpsRate(k)=', eqpsRate(k)
        end do
    return
end

```

## S2. The developed code for VUMAT subroutine

```
subroutine vumat(
C Read only (unmodifiable) variables -
1  nblock, ndir, nshr, nstatev, nfieldv, nprops, jInfoArray,
2  stepTime, totalTime, dtArray, cmname, coordMp, charLength,
3  props, density, strainInc, relSpinInc,
4  tempOld, stretchOld, defgradOld, fieldOld,
5  stressOld, stateOld, enerInternOld, enerInelasOld,
6  tempNew, stretchNew, defgradNew, fieldNew,
C Write only (modifiable) variables -
7  stressNew, stateNew, enerInternNew, enerInelasNew )
C
  include 'vaba_param.inc'
  parameter (i_info_AnnealFlag = 1,
*           i_info_Intpt      = 2, ! Integration station number
*           i_info_layer      = 3, ! Layer number
*           i_info_kspt       = 4, ! Section point number in current layer
*           i_info_effModDefn = 5, ! =1 if Bulk/ShearMod need to be defined
*           i_info_ElemNumStartLoc = 6) ! Start loc of user element number
C
  dimension props(nprops), density(nblock), coordMp(nblock,*),
1  charLength(nblock), dtArray(2*(nblock)+1),
strainInc(nblock,ndir+nshr),
2  relSpinInc(nblock,nshr), tempOld(nblock),
3  stretchOld(nblock,ndir+nshr),
4  defgradOld(nblock,ndir+nshr+nshr),
5  fieldOld(nblock,nfieldv), stressOld(nblock,ndir+nshr),
6  stateOld(nblock,nstatev), enerInternOld(nblock),
7  enerInelasOld(nblock), tempNew(nblock),
8  stretchNew(nblock,ndir+nshr),
8  defgradNew(nblock,ndir+nshr+nshr),
9  fieldNew(nblock,nfieldv),
1  stressNew(nblock,ndir+nshr), stateNew(nblock,nstatev),
2  enerInternNew(nblock), enerInelasNew(nblock), jInfoArray(*)
C
  character*80 cmname
C
  pointer (ptrjElemNum, jElemNum)
  dimension jElemNum(nblock)
C
  lAnneal = jInfoArray(i_info_AnnealFlag)
  iLayer = jInfoArray(i_info_layer)
  kspt = jInfoArray(i_info_kspt)
  intPt = jInfoArray(i_info_Intpt)
  iUpdateEffMod = jInfoArray(i_info_effModDefn)
  iElemNumStartLoc = jInfoArray(i_info_ElemNumStartLoc)
  ptrjElemNum = loc(jInfoArray(iElemNumStartLoc))
C
C Material property definitions
      e      = props(1)
      xnu    = props(2)
      kb3    = props(3)
      goi    = props(4)
```

```

        ddeqps0 = props(5)
        theta = props(6)
        p = props(7)
        q = props(8)
        e0 = props(9)
        h = props(10)
        k2 = props(11)
        abm = props(12)
        Khp = props(13)
        alpha = props(14)
        ala = props(15)
        t = props(16)
        U0 = props(17)
        D = props(18)
        T0 = props(19)

C
C Find the shear and bulk modulus.
C
         $\mu = e / (2 * (1 + \nu))$ 
        bulk =  $e / (3 * (1 - 2 * \nu))$ 
        alambda =  $e * \nu / ((1 + \nu) * (1 - 2 * \nu))$ 
        write (*,*) 'μ=', μ
        write (*,*) 'bulk=', bulk
        write (*,*) 'alamda=', alambda

C
        if ((stepTime+totalTime).eq.0.0) then
            do i=1,nblock
                trace=strainInc(i,1)+strainInc(i,2)+strainInc(i,3)
                write (*,*) 'trace=', trace
C New stress tensor due to elastic behaviour

stressNew(i,1)=stressOld(i,1)+two*G*strainInc(i,1)+alamda*trace
stressNew(i,2)=stressOld(i,2)+two*G*strainInc(i,2)+alamda*trace
stressNew(i,3)=stressOld(i,3)+two*G*strainInc(i,3)+alamda*trace
stressNew(i,4)=stressOld(i,4)+two*G*strainInc(i,4)
        if (nshr.gt.1) then
            stressNew(i,5)=stressOld(i,5)+two*G*strainInc(i,5)
            stressNew(i,6)=stressOld(i,6)+two*G*strainInc(i,6)
        end if
            write(*,*) 'stressNew(i,1)=', stressNew(i,1)
            write(*,*) 'stressNew(i,2)=', stressNew(i,2)
            write(*,*) 'stressNew(i,4)=', stressNew(i,4)
        end do
    else
        do i=1,nblock
C
C Initialize the yield stress, plastic strain, and strain rate of the last
C increment.
C
            deqps = stateOld(i,1)
            ddeqps = stateOld(i,2)
            yieldOld = stateOld(i,3)
            Temp = TempOld(i)
C The Hall-Petch relationship from the alpha length thickness (t)

```

```

        Khp_D=Khp/sqrt(t)
        write (*,*) 'Khp_D=', Khp_D
C Initialize small initial plastic strain.
        depl=1e-8
C Compute for Temperature dependent shear modulus
        if (temp.eq.0. D0) then
            U=U0
        else
            U=U0-((D/(exp(T0/temp)-1.0))) *10**3
        end if
        write (*,*) 'U=', U
C
C Compute for yielding: Athermal and thermal components from the
C constitutive model.
C
C Thermal part of flow stress

        thermal1=1-((kb3*temp)/(goi*U) *log(ddeqps0/(ddeqps))) ** (1.0/q)
        thermal2=theta*thermal1**(1.0/p) *U/U0
        write (*,*) 'thermal1=', thermal1
        write (*,*) 'thermal2=', thermal2
C
        Athermal part of flow stress
        athermal1=(1-exp(-k2*deqps)) *h/k2
        athermal2=e0*exp(-k2*deqps)
        athermal3=ala*(1-exp(-alpha*(ddeqps)))
        athermal4=sqrt(athermal1+athermal2) *abm*U +athermal3 + Khp_D
        write (*,*) 'athermal1=', athermal1
        write (*,*) 'athermal2=', athermal2
        write (*,*) 'athermal3=', athermal3
        write (*,*) 'athermal4=', athermal4
C
C Compute for old yield stress
C
        yieldOld=thermal2+athermal4
        write (*,*) 'yieldOld=', yieldOld
C Compute for Partial derivative of yield stress w.r.t equivalent plastic
C strain (hard).
C
        hard1=abm*U/2*(athermal1+athermal2) **(-1.0/2)
        hard2=h*exp(-k2*deqps) -(e0*k2*exp(-k2*deqps))
        hard=hard1*hard2
        write (*,*) 'hard1=', hard1
        write (*,*) 'hard2=', hard2
        write (*,*) 'hard=', hard
C
C Find the new trace and stress tensor.
C
        trace= strainInc(i,1) + strainInc(i,2) + strainInc(i,3)
        s11= stressOld(i,1) + 2*G*strainInc(i,1) + alambda*trace
        s22= stressOld(i,2) + 2*G*strainInc(i,2) + alambda*trace
        s33= stressOld(i,3) + 2*G*strainInc(i,3) + alambda*trace
        s12= stressOld(i,4) + 2*G*strainInc(i,4)
        if (nshr.gt.1.0) then
            s13= stressOld(i,5) + 2*G*strainInc(i,5)
            s23= stressOld(i,6) + 2*G*strainInc(i,6)
        end if
C Compute hydrostatic stress.

```

```

smean=(s11+s22+s33)/3.0
C
C Compute deviatoric stress from hydrostatic stress and stress tensor.
s1 = s11 - smean
s2 = s22 - smean
s3 = s33 - smean
s4 = s12
s5 = s13
s6 = s23
C Compute the equivalent mises stress from deviatoric stress.
if (nshr.eq.1) then
    vmises = sqrt(1.5*(s1**2+s2**2+s3**2+2*s4**2))
else
    vmises= sqrt(1.5*(s1**2+s2**2+s3**2+2*(s4**2+s5**2+s6**2)))
    write (*,*) 'vmises=',vmises
end if
C
sigdif = vmises - yieldOld
facyld = 0.0
if (sigdif.gt.0.0) facyld = 1.0
deqps = facyld*sigdif/(3*G + hard)
write (*,*) 'deqps=',deqps
write (*,*) 'dt=',dtArray(1)
write (*,*) 'sigdif=',sigdif
C
C Compute the initial the plastic strain rate from increment in plastic
C strain.
if (deqps.gt.0.0) then
    ddeqps=deqps/dtArray (1)
else
    ddeqps=1.0
end if
write (*,*) 'ddeqps=',ddeqps
C
C Update the stress
yieldNew = yieldOld + hard* deqps
write (*,*) 'yieldNew=',yieldNew
factor = yieldNew/(yieldNew+3*G*deqps)
write (*,*) 'factor=', factor
C
C Find new stress tensor.
C
stressNew(i,1) = s1*factor + smean
stressNew(i,2) = s2*factor + smean
stressNew(i,3) = s3*factor + smean
stressNew(i,4) = s4*factor
if (nshr.gt.1) then
    stressNew(i,5) = s5*factor
    stressNew(i,6) = s5*factor
end if
C
C New equivalent deviatoric stress and von Mises equivalent
s1=s1*factor
s2=s2*factor
s3=s3*factor
s4=s4*factor

```

```

        s5=s5*factor
        s6=s6*factor
C Update the state variables.
        stateNew(i,1) = stateOld(i,1) + deqps
        stateNew(i,2) = ddeqps
        stateNew(i,3) = yieldOld
        write(*,*) 'stateNew(i,1)=', stateNew(i,1)
        write(*,*) 'stateNew(i,3)=', stateNew(i,3)
C
C Update the specific internal energy.
C
        sp1=(stressOld(i,1) +stressNew(i,1)) *strainInc(i,1)
        sp2=(stressOld(i,2) +stressNew(i,2)) *strainInc(i,2)
        sp3=(stressOld(i,3) +stressNew(i,3)) *strainInc(i,3)
        sp4=(stressOld(i,4) +stressNew(i,4)) *strainInc(i,4)
        sp5=(stressOld(i,5) +stressNew(i,5)) *strainInc(i,5)
        sp6=(stressOld(i,6) +stressNew(i,6)) *strainInc(i,6)
        if (nshr.eq.1) then
stress Power =0.5*(sp1+sp2+sp3) +sp4
        else
stress Power = 0.5*(sp1+sp2+sp3) +sp4+sp5+sp6
        end if
        enerInternNew(i) = enerInternOld(i)+ stressPower / density(i)
C
C Update the dissipated inelastic energy.
C Transfer old value of inelastic specific energy
C        enerInelasNew(i) = enerInelasOld(i)
C
        plasticWorkInc=0.5*(yieldNew)*deqps
        write(*,*) 'plasticWorkInc=', plasticWorkInc
        enerInelasNew(i)=enerInelasOld(i)+plasticWorkInc/density(i)

        end do
    end if
return
end

```
